# Supplementary material for: Gleditsia sinensis: Transcriptome Sequencing, Construction, and Application of Its Protein-Protein Interaction Network
Source: Biomed Res Int. 2014 May 27;2014:404578. doi: 10.1155/2014/404578 (PMC4058233; doi:10.1155/2014/404578)
Supplement: Supplementary file 1 — Additional File 1: Information for GO classification of Gleditsia sinensis unigenes. Additional File 2: Results for KEGG pathway mapping of Gleditsia sinensis unigenes. Additional File 3: Information for COG classification of Gleditsia sinensis unigenes. Additional File 4: Resistant genes relating to cold, drought and salinity tolerance in Gleditsia sinensis identified by comparing to the known resistant genes from Arabidopsis thaliana. Figure S1: Illustration of the PPI network of UniGenes in G. sinensis. [file 404578.f1.zip]

Archive with 5 entries (5 files):
- 404578.f1/Additional file1.GO_file
- 404578.f1/Additional file2.KEGG
- 404578.f1/Additional file3 COG_list_use
- 404578.f1/Additional file4.xls
- 404578.f1/FigS1.pdf
