# Supplementary figures and images for: Gleditsia sinensis: Transcriptome Sequencing, Construction, and Application of Its Protein-Protein Interaction Network
Source: Hindawi journal article supplement (doi:10.1155/2014/404578), 2014-01-01

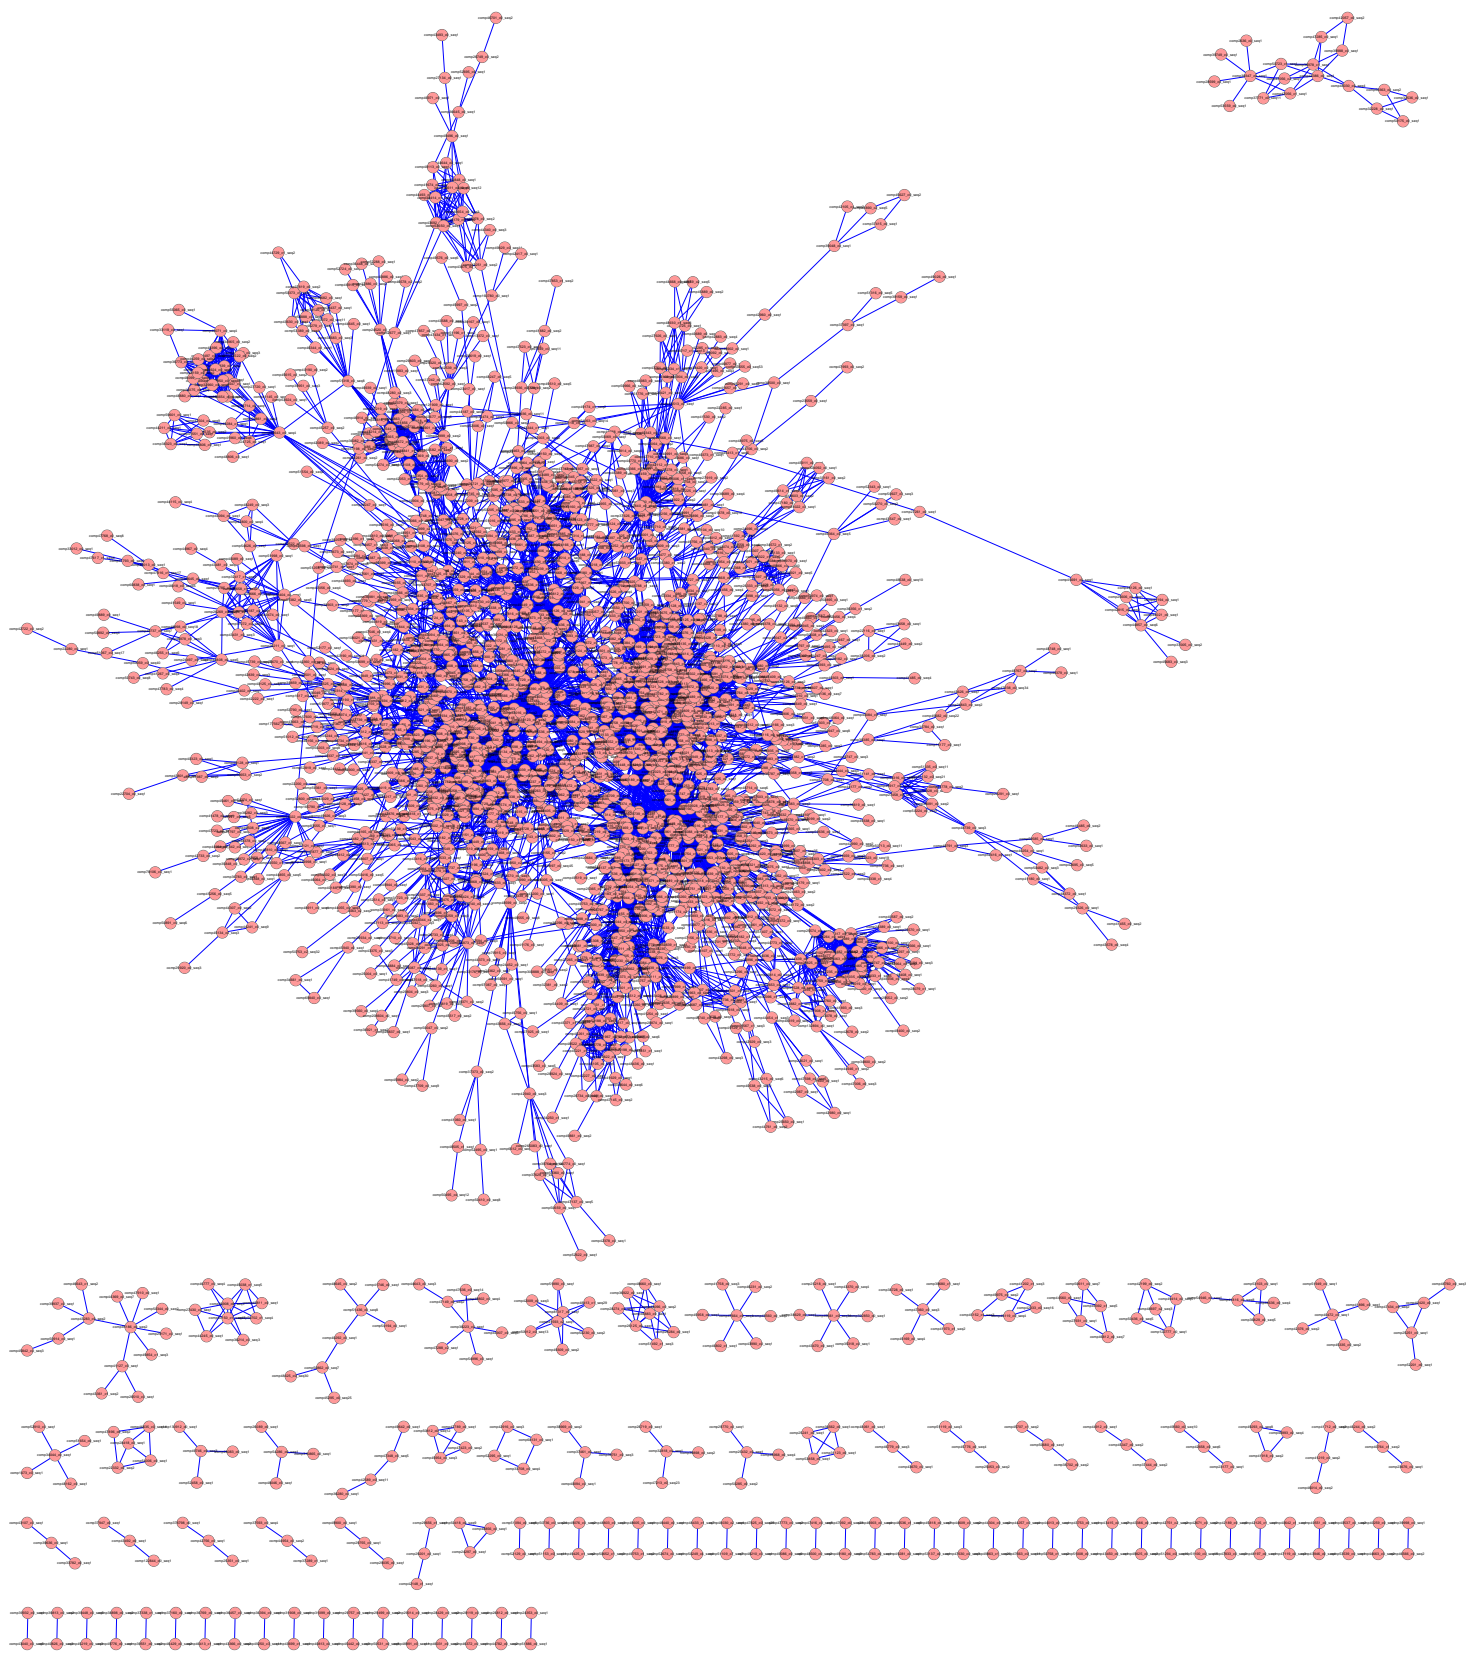

Supplement: f1 [file 404578.f1.zip]
